# Supplementary material for: A quantum dot–lucigenin probe for Cl−
Source: Royal Society of Chemistry journal article supplement (doi:10.1039/b801507d), 2008-01-01
Supplement: b801507d.pdf [file b801507d.pdf]

## Supplementary Information

### A Quantum dot-lucigenin probe for $\text{Cl}^-$

Maria Jose Ruedas-Rama and Elizabeth A. H. Hall\*

*Institute of Biotechnology, University of Cambridge, Tennis Court Road, Cambridge, UK CB2 1QT. E-mail: [lisa.hall@biotech.cam.ac.uk](mailto:lisa.hall@biotech.cam.ac.uk); Fax: + 44 1223 334161; Tel: +44 1223 334149*

#### Chloride response of QD-MPA-lucigenin and QD-DHLA-lucigenin conjugates

Lucigenin was coupled to QDs-MPA or QDs-DHLA through electrostatic interaction between negatively charged QD surfaces and the positively charged nitrogens of lucigenin. Lucigenin produces a quenching of the both QDs luminescence, which is restored by adding chloride ion. Figure SI-1 shows the enhancement of the luminescence of QDs-MPA and QD-DHLA in the presence of different chloride concentrations. Both conjugates show similar response toward chloride ions.

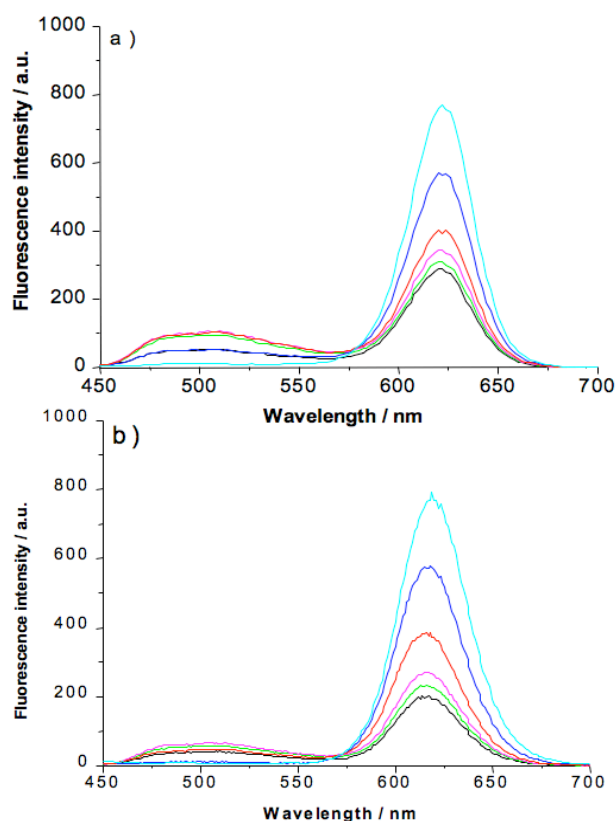

**Figure SI-1.** Enhancement of luminescence of (a) QD<sub>620</sub>-MPA-lucigenin and (b) QD<sub>620</sub>-DHLA-lucigenin conjugates by different chloride ions concentrations: black (0 mM); green (0.1 mM); pink (1 mM); red (10 mM); blue (100 mM); cyan (500 mM).
